# Supplementary material for: Directly hydrothermal growth of ultrathin MoS2 nanostructured films as high performance counter electrodes for dye-sensitised solar cells
Source: Royal Society of Chemistry journal article supplement (doi:10.1039/c4ra00583j), 2014-01-01
Supplement: c4ra00583j1.pdf [file c4ra00583j1.pdf]

## Directly hydrothermal growth of ultrathin MoS<sub>2</sub> nanostructured films as high performance counter electrodes for dye-sensitised solar cells

Mohammad Al-Mamun,<sup>a</sup> Haimin Zhang,<sup>\*a</sup> Porun Liu,<sup>a</sup> Yun Wang,<sup>a</sup> Jun Cao<sup>a,c</sup> and Huijun Zhao<sup>\*a,b</sup>

<sup>a</sup> Centre for Clean Environment and Energy, Griffith University, Gold Coast Campus, QLD 4222, Australia

<sup>b</sup> Centre for Environmental and Energy Nanomaterials, Institutes of Solid State Physics, Chinese Academy of Sciences, Hefei 230031, China

<sup>c</sup> Student Office, Qingdao University, Qingdao 266071, China

E-mail: [h.zhao@griffith.edu.au](mailto:h.zhao@griffith.edu.au); [haimin.zhang@griffith.edu.au](mailto:haimin.zhang@griffith.edu.au); Fax: +61-7 55528067; Tel: +61-7 55528261

**Table S1** A partial literature review of the DSSCs performance assembled with MoS<sub>2</sub> based counter electrodes.

| Counter Electrodes         | PCEs (%) composite | PCEs (%) Pure MoS <sub>2</sub> | PCEs (%) Pt | Thickness (μm) | T (%)  | Refs.         |
|----------------------------|--------------------|--------------------------------|-------------|----------------|--------|---------------|
| MoS <sub>2</sub>           | —                  | 7.59                           | 7.64        | 20             | Opaque | 1             |
| MoS <sub>2</sub> /graphene | 5.98               | —                              | 6.23        | 6              | Opaque | 2             |
| MoS <sub>2</sub> /graphene | 6.04               | 5.09                           | 6.38        | 4              | Opaque | 3             |
| MWCNT/MoS <sub>2</sub>     | 6.45               | 4.99                           | 6.41        | 20             | Opaque | 4             |
| MoS <sub>2</sub> -C        | 7.69               | 5.36                           | 6.74        | 12             | Opaque | 5             |
| MoS <sub>2</sub> -GNS      | 5.81               | 4.15                           | 6.24        | 0.25-3.0       | 0-70   | 6             |
| MoS <sub>2</sub>           | —                  | 7.01                           | 7.31        | 0.1            | —      | 7             |
| MoS <sub>2</sub> /GF       | 6.07               | 4.10                           | 6.41        | 6              | Opaque | 8             |
| MoS <sub>2</sub>           | —                  | 5.41                           | 6.58        | 0.4            | >80    | 9             |
| MoS <sub>2</sub>           | —                  | 7.41                           | 7.13        | 0.49           | 56     | Present study |

**Table S2** Photovoltaic parameters of three parallel DSSCs prepared by various MoS<sub>2</sub>-based counter electrodes showing the average values with standard deviation.

| CEs       | $V_{oc}$<br>(mV) | $J_{sc}$<br>(mA cm <sup>-2</sup> ) | $\eta$<br>(%) | $FF$<br>(%) |      |           |      |           |
|-----------|------------------|------------------------------------|---------------|-------------|------|-----------|------|-----------|
| MS-150-7  | 691              |                                    | 13.92         | 3.70        |      |           |      |           |
|           | 689              | 690±1.52                           | 13.82         | 13.89±0.07  | 3.60 | 3.67±0.06 | 37.9 | 38.5±0.65 |
|           | 692              |                                    | 13.95         |             | 3.71 |           | 39.2 |           |
| MS-150-14 | 702              |                                    | 15.17         |             | 4.97 |           | 46.7 |           |
|           | 703              | 702±0.58                           | 15.21         | 15.18±0.02  | 4.99 | 4.97±0.02 | 46.9 | 46.5±0.59 |
|           | 702              |                                    | 15.16         |             | 4.95 |           | 45.8 |           |
| MS-150-28 | 698              |                                    | 18.37         |             | 7.41 |           | 57.8 |           |
|           | 690              | 696±5.69                           | 18.40         | 18.24±0.24  | 7.40 | 7.40±0.02 | 57.2 | 57.2±0.65 |
|           | 701              |                                    | 17.97         |             | 7.38 |           | 56.5 |           |
| MS-150-42 | 673              |                                    | 13.44         |             | 4.96 |           | 54.9 |           |
|           | 679              | 674±4.58                           | 13.45         | 13.41±0.06  | 4.95 | 4.94±0.03 | 54.2 | 54.3±0.58 |
|           | 670              |                                    | 13.35         |             | 4.90 |           | 53.8 |           |
| MS-120-28 | 708              |                                    | 14.25         |             | 5.52 |           | 54.8 |           |
|           | 709              | 709±0.58                           | 14.30         | 14.18±0.16  | 5.54 | 5.52±0.03 | 55.1 | 54.6±0.57 |
|           | 709              |                                    | 14.00         |             | 5.49 |           | 54.0 |           |
| MS-180-28 | 709              |                                    | 16.33         |             | 7.15 |           | 61.7 |           |
|           | 708              | 709±1.00                           | 16.10         | 16.13±0.19  | 7.10 | 7.12±0.03 | 60.2 | 61.0±0.75 |
|           | 710              |                                    | 15.95         |             | 7.12 |           | 61.1 |           |
| MS-210-28 | 709              |                                    | 12.76         |             | 5.47 |           | 60.5 |           |
|           | 709              | 709±0.58                           | 12.05         | 12.59±0.47  | 5.42 | 5.45±0.03 | 58.2 | 59.8±1.39 |
|           | 708              |                                    | 12.95         |             | 5.48 |           | 60.7 |           |
| Pt        | 722              |                                    | 16.78         |             | 7.13 |           | 58.8 |           |
|           | 729              | 723±5.57                           | 15.90         | 16.55±0.57  | 7.09 | 7.13±0.05 | 57.2 | 57.6±1.02 |
|           | 718              |                                    | 16.98         |             | 7.19 |           | 56.9 |           |

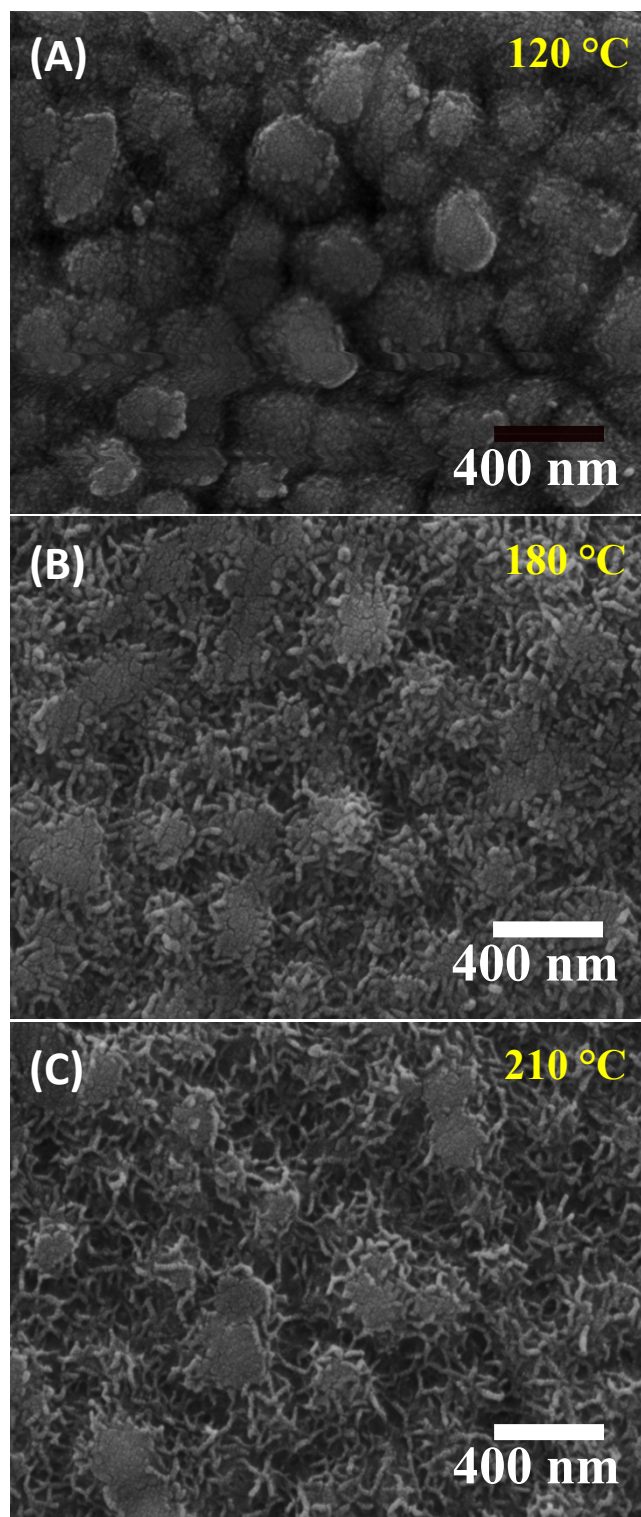

**Fig. S1** Surface SEM images of MoS<sub>2</sub> samples prepared with fixed precursor molar ratio of 1:28 at different reaction temperatures. (A) 120 °C, (B) 180 °C and (C) 210 °C.

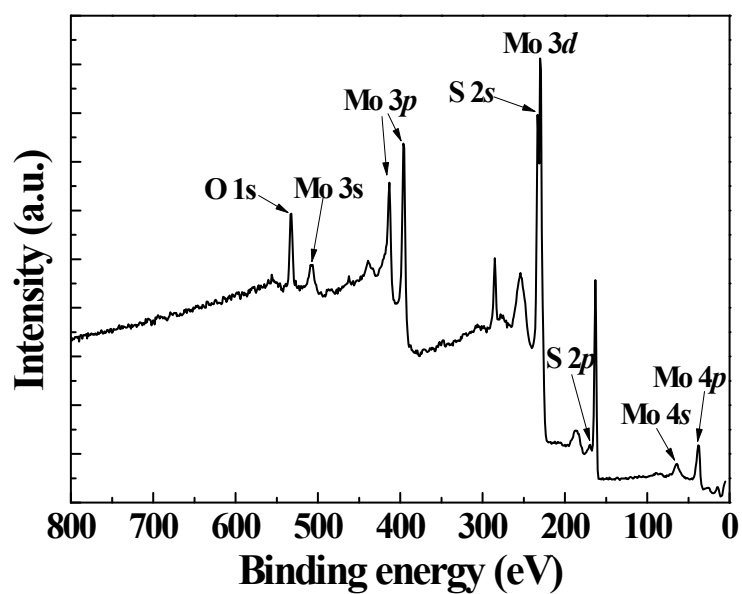

**Fig. S2** Survey XPS spectra of MoS<sub>2</sub> film prepared at 150 °C under the reaction precursor molar ratio of 1:28.

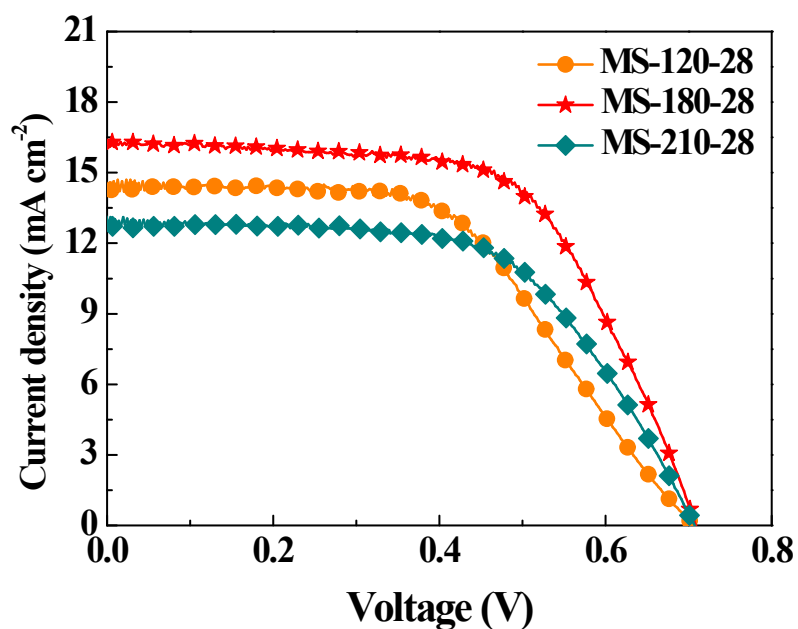

**Fig. S3** Photocurrent-voltage curves of DSSCs assembled with different MoS<sub>2</sub> counter electrodes prepared under different hydrothermal reaction temperatures at fixed precursor molar ratio of 1:28.

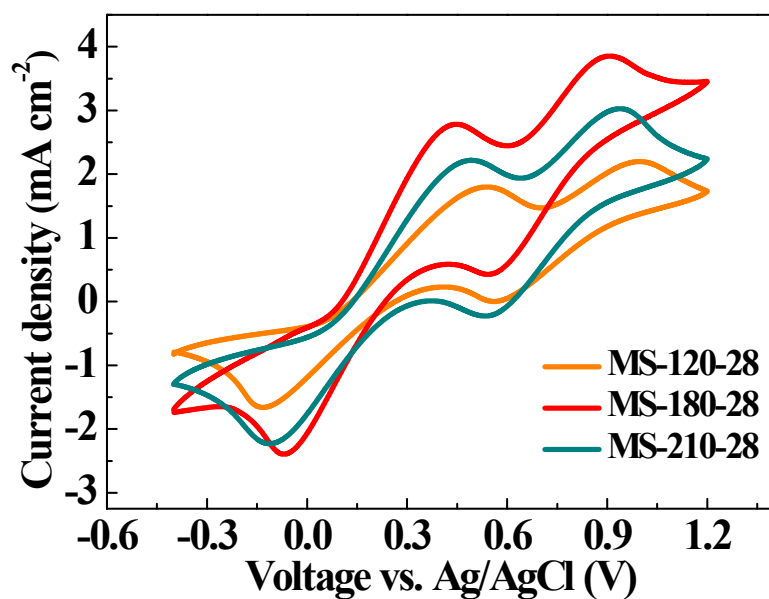

**Fig. S4** Cyclic voltammograms (CVs) of MoS<sub>2</sub> electrodes prepared at different hydrothermal reaction temperatures with fixed precursor molar ratio of 1:28.

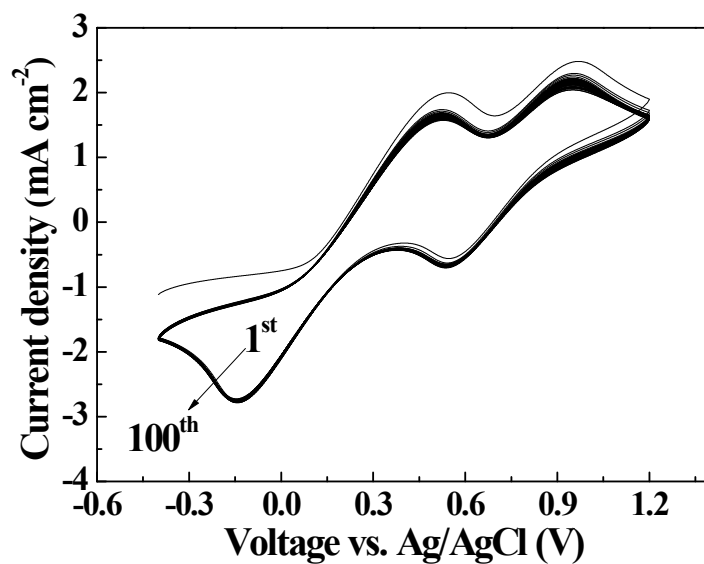

**Fig. S5** A consecutive 100 cyclic voltammograms (CVs) for I<sub>3</sub><sup>-</sup>/I<sup>-</sup> redox system using MS-150-28 electrode at a scan rate of 100 mV s<sup>-1</sup>.

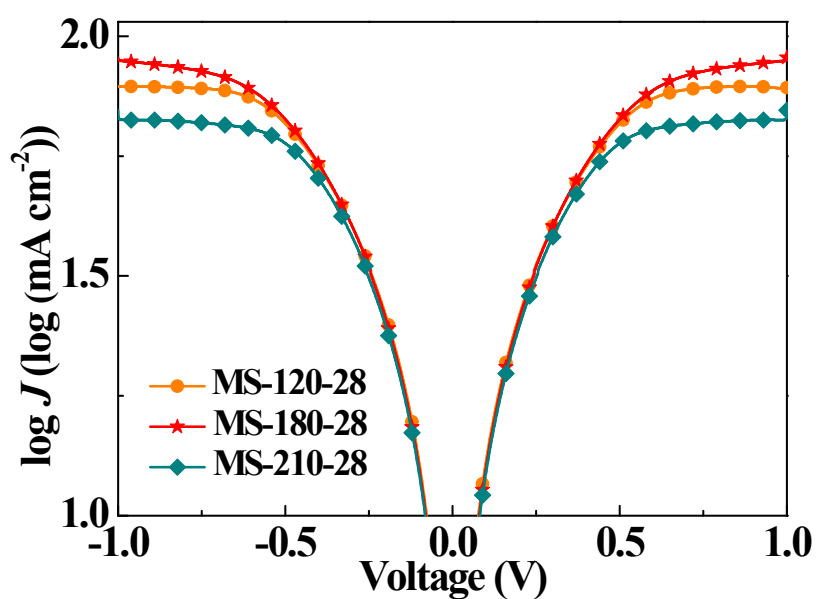

**Fig. S6** Tafel polarisation curves of MoS<sub>2</sub> electrodes prepared at different hydrothermal reaction temperatures with fixed precursor molar ratio of 1:28.

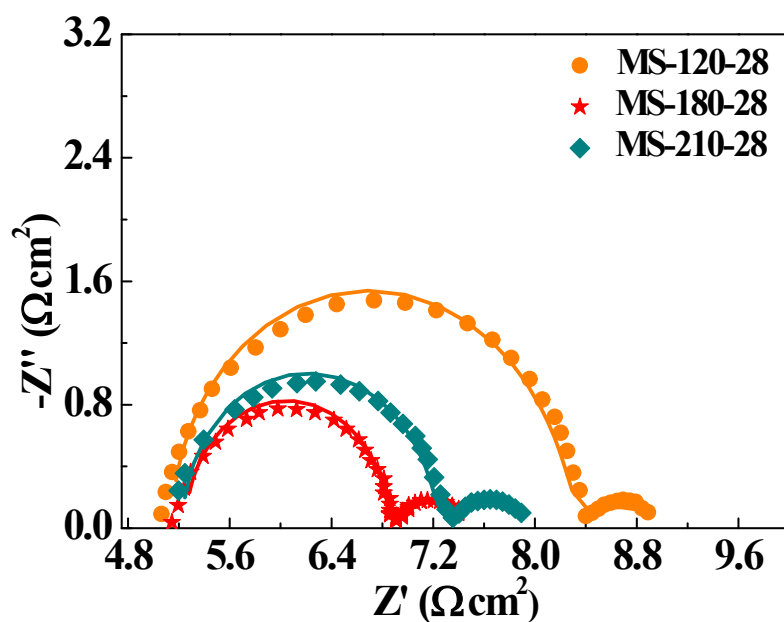

**Fig. S7** Nyquist plots of the dummy cells fabricated with two identical MoS<sub>2</sub> electrodes prepared at different hydrothermal reaction temperatures with fixed precursor molar ratio of 1:28. Symbols represent the experimental data and solid lines represent the model fitting.

## References

1. M. Wu, Y. Wang, X. Lin, N. Yu, L. Wang, L. Wang, A. Hagfeldt and T. Ma, *Phys. Chem. Chem. Phys.*, 2011, **13**, 19298.
2. G. Yue, J.Y. Lin, S.Y. Tai, Y. Xiao and J. Wu, *Electrochim. Acta*, 2012, **85**, 162.
3. C.J. Liu, S.Y. Tai, S.W. Chou, Y.C. Yu, K.D. Chang, S. Wang, F. S.S. Chien, J.Y. Lin and T.W. Lin, *J. Mater. Chem.*, 2012, **22**, 21057.
4. S.Y. Tai, C.J. Liu, S.W. Chou, F. S.S. Chien, J.Y. Lin and T.W. Lin, *J. Mater. Chem.*, 2012, **22**, 24753.
5. G. Yue, J. Wu, Y. Xiao, M. Huang, J. Lin and J.Y. Lin, *J. Mater. Chem. A*, 2013, **1**, 1495.
6. J.Y. Lin, C.Y. Chan and S.W. Chou, *Chem. Commun.*, 2013, **49**, 1440.
7. S. A. Patil, P. Y. Kalode, R. S. Mane, M. M. M. Sung, S. B. Ambade and S. H. Han, *Dalton Trans.*, 2014, **43**, 5256.
8. J.Y. Lin, G. Yue, S.Y. Tai, Y. Xiao, H.M. Cheng, F.M. Wang and J. Wu, *Mater. Chem. Phys.*, 2013, **143**, 53.
9. G. Li, B. Lei and X. Gao, *J. Mater. Chem. A*, 2014, **2**, 3919.
